# Supplementary material
Source: MDPI journal article supplement (https://www.mdpi.com/2072-4292/13/20/4105)
Supplement: s1 [file s1]

## Supplementary Tables and Figures

**Table S1.** Statistics of Atmospheric inputs over Landsat 8 series.

| <b>Variable</b> | <b>min</b> | <b>mean</b> | <b>max</b> | <b>std</b> | <b>cv</b> |
|-----------------|------------|-------------|------------|------------|-----------|
| <i>Lup</i>      | 0.66       | 1.08        | 1.37       | 0.17       | 16.06%    |
| <i>Ldown</i>    | 1.29       | 2.70        | 5.70       | 0.76       | 28.41%    |
| <i>t</i>        | 0.49       | 0.77        | 0.89       | 0.07       | 9.42%     |

### S2 Time series Aerosol Optical Thickness statistics

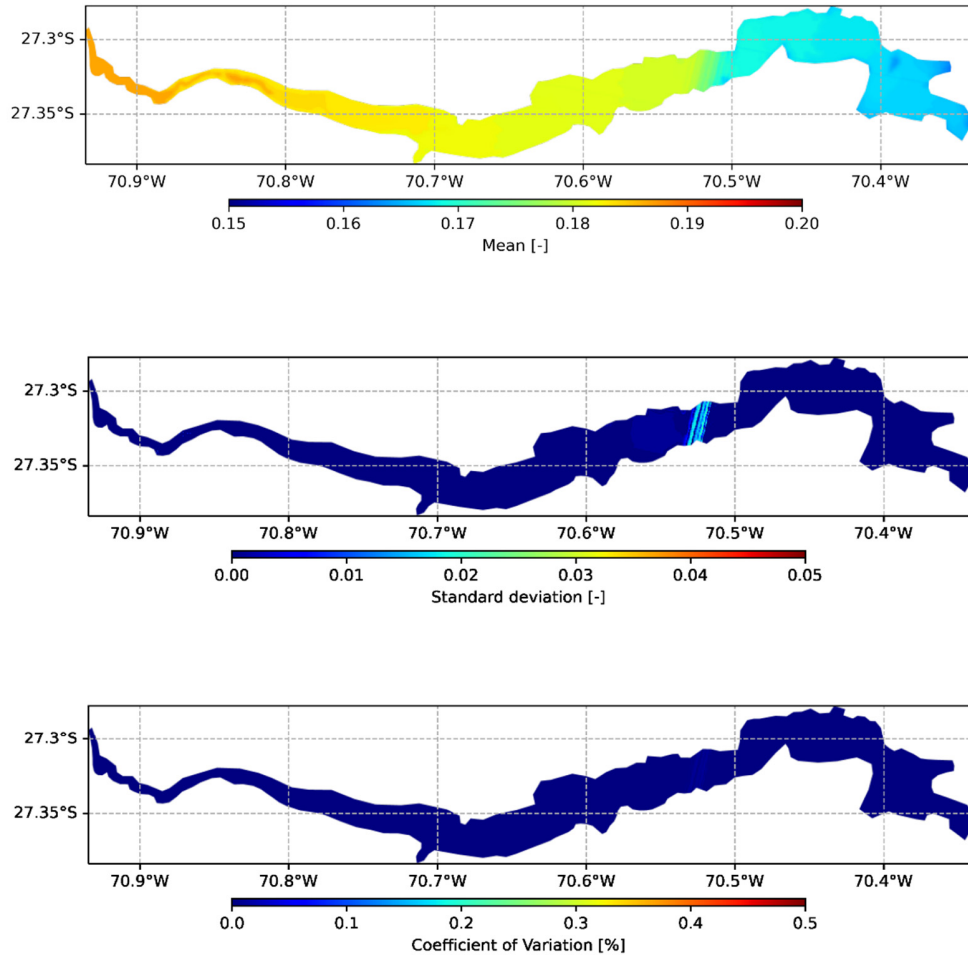

**Figure S1.** Mean, Standard Deviation and Coefficient of Variation of Aerosol Optical Thickness (AOT) retrieved from Sen2Cor for all images during study period over Copiapó valley.

## S2 Time series Water Vapor statistics

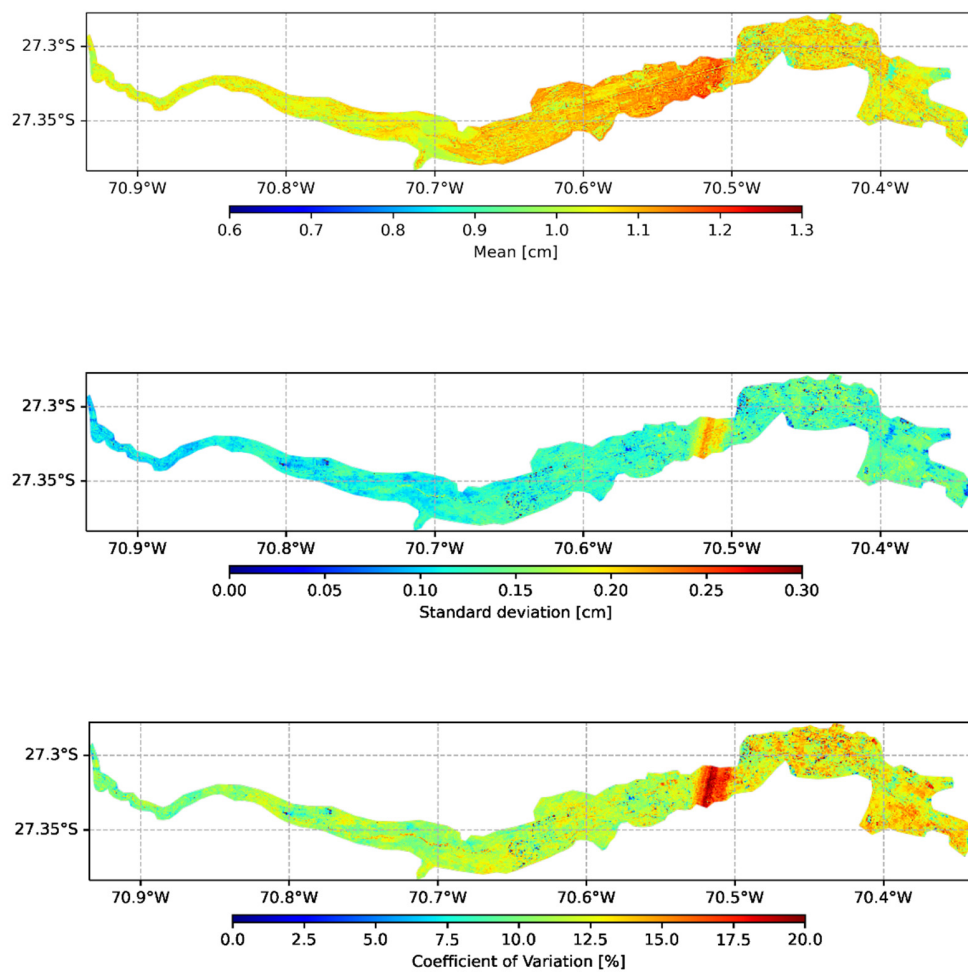

**Figure S2.** Mean, Standard Deviation and Coefficient of Variation of Water Vapor (WV) retrieved from Sen2Cor for all images during study period over Copiapó valley.

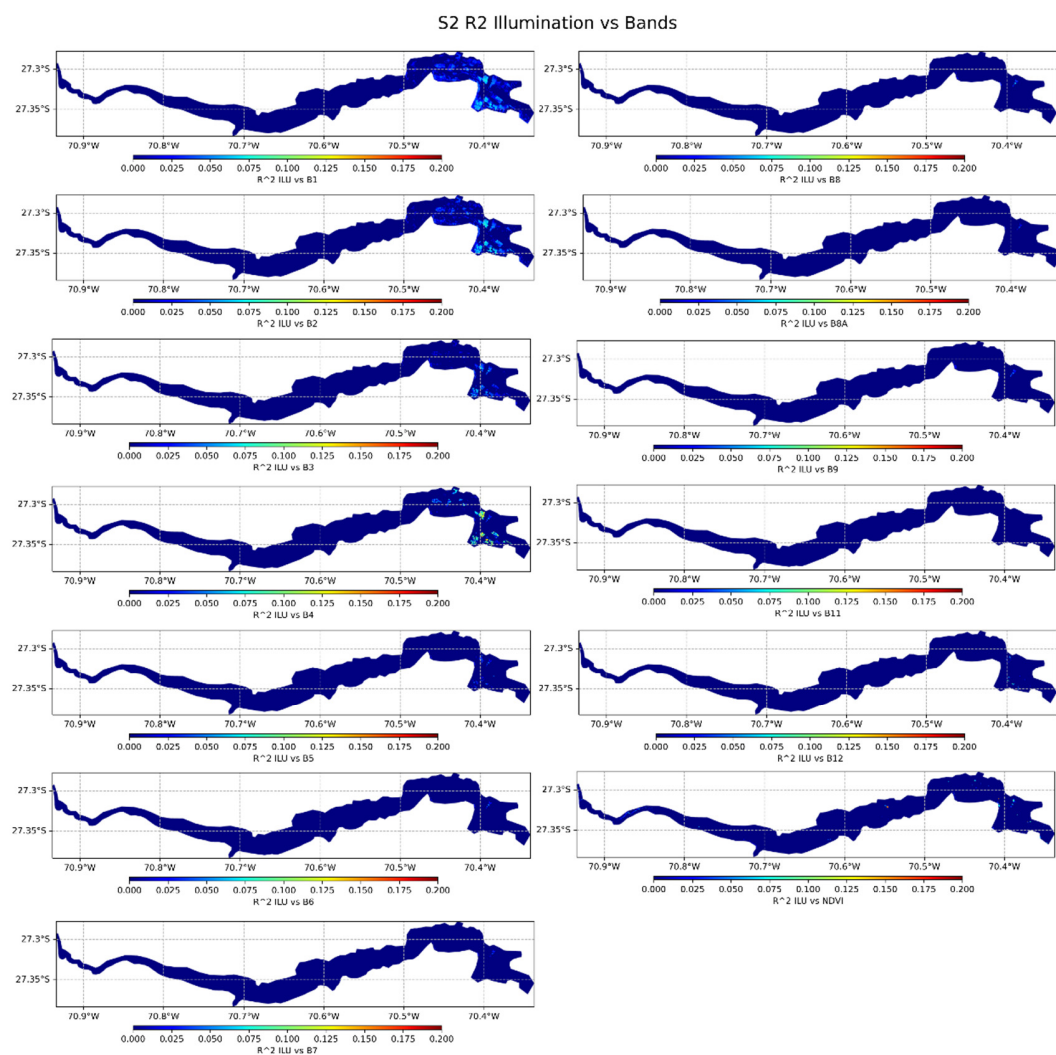

**Figure S3.** Coefficient of determination ( $R^2$ ) between Illumination and Sentinel 2 Bands, NDVI during study period in Copiapó valley.
